# Supplementary material
Source: MDPI journal article supplement (https://www.mdpi.com/2227-7102/15/5/602)

## **Document 1: Focus group guide**

1. Did you engage with your peer support group 401372 The Social Determinants of Health? If yes, why? If no, why?
2. Can you share what were some facilitators to engage in peer support group?  
Pointers –same culture, assessment discussion, making friendships, getting to know others in same course
3. What were some barriers that prevented you to engage in peer support intervention?  
Pointers – Work, family commitment, from a different course (eg: nursing)
4. How did you engage with peer support group members?  
Pointers – Who/What/When/How/Method of engagement/Frequency spoke within the group or to others outside? Why?  
via Facebook, WhatsApp etc.?
5. Share your experiences on other peer member's engagement.  
Pointers – Did everyone engage?
6. How could we use peer support to improve student engagement?  
Pointers - How can we engage students who are unresponsive?
7. How did the peer support help you to transition and settle into the 401372 unit and the university?
8. How did peer support help you grow personally and professionally?
9. How did you use peer support to network with other students? What benefit did it bring to you?
10. How did peer support play for you in completing the 401372 Social Determinants unit? Pointer – Did you contact others on query about assessment?  
How can we get students to talk to each other?
11. Share your thoughts on how peer support helped you with achieving the unit and course learning outcomes.
12. What can be done to further improve peer support in 401372 The Social Determinants of Health?  
Eg: Bonus 5 marks, make bigger groups, make group depending on course, make one large group per class, have a peer leader and deputy leader.
13. Share your thoughts on how your peer support group provided psychological and social support amidst the COVID pandemic.
14. How did peer support help improve your health and well-being?

**Figure 1: Thematic map showing the interaction between themes and subthemes**

# Main Canvas Views

## Quirks Canvas - Primary

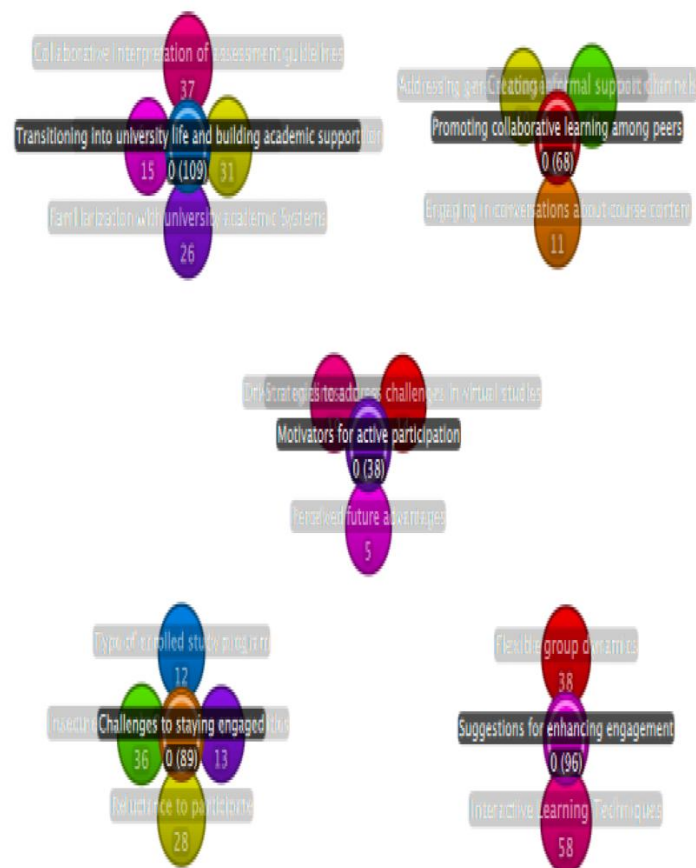

Supplement: s1 [file education-3479260-supplementary.pdf › education-3479260-supplementary.pdf]
